# Supplementary material
Source: PubMed Central journal article supplement (PMC2978957)

## Supplemental Data

### Extending Rare-Variant Testing Strategies:

### Analysis of Noncoding Sequence and Imputed Genotypes

Matthew Zawistowski, Shyam Gopalakrishnan, Jun Ding, Yun Li, Sara Grimm, and Sebastian Zöllner

**Figure S1.** Type I Error Rates for the Rare Variant Tests. Power is computed at  $\alpha=0.01$  on datasets with  $N=1000$  cases and controls at the indicated neutral inclusion rates ( $p_n$ ). Type I error for the CMAT, WSS and collapsing (COLL) tests is well-controlled across values of  $p_n$ . Type I error for the private allele test (PRIV) is initially conservative then increases with  $p_n$  becoming anti-conservative.

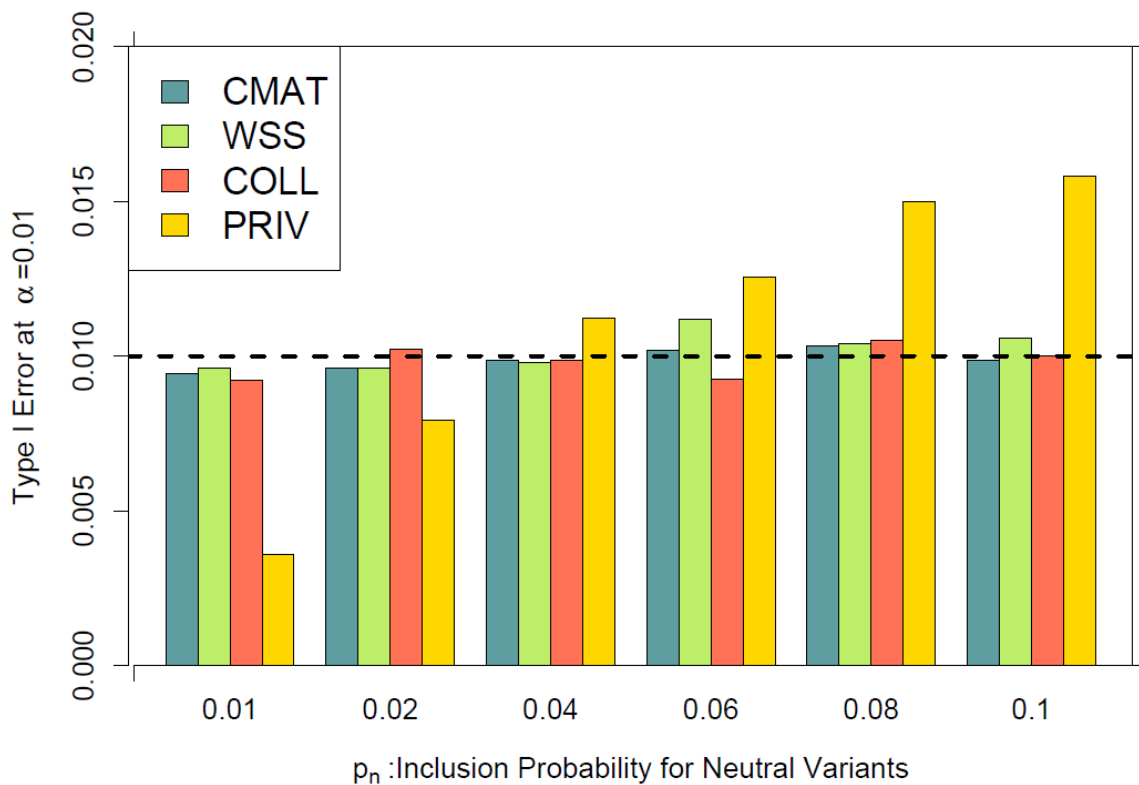

**Figure S2.** Power for CMAT and WSS using both uniform weighting (Eq. 2) and maf-based weights described in [13]. Conditional on weighting scheme, the CMAT and WSS have similar power across the grid. The maf-based weights correspond more closely to our disease model (Fig. 1) than do the simple uniform weights and therefore provided a more powerful analysis for both methods except when misspecification rates are highest.

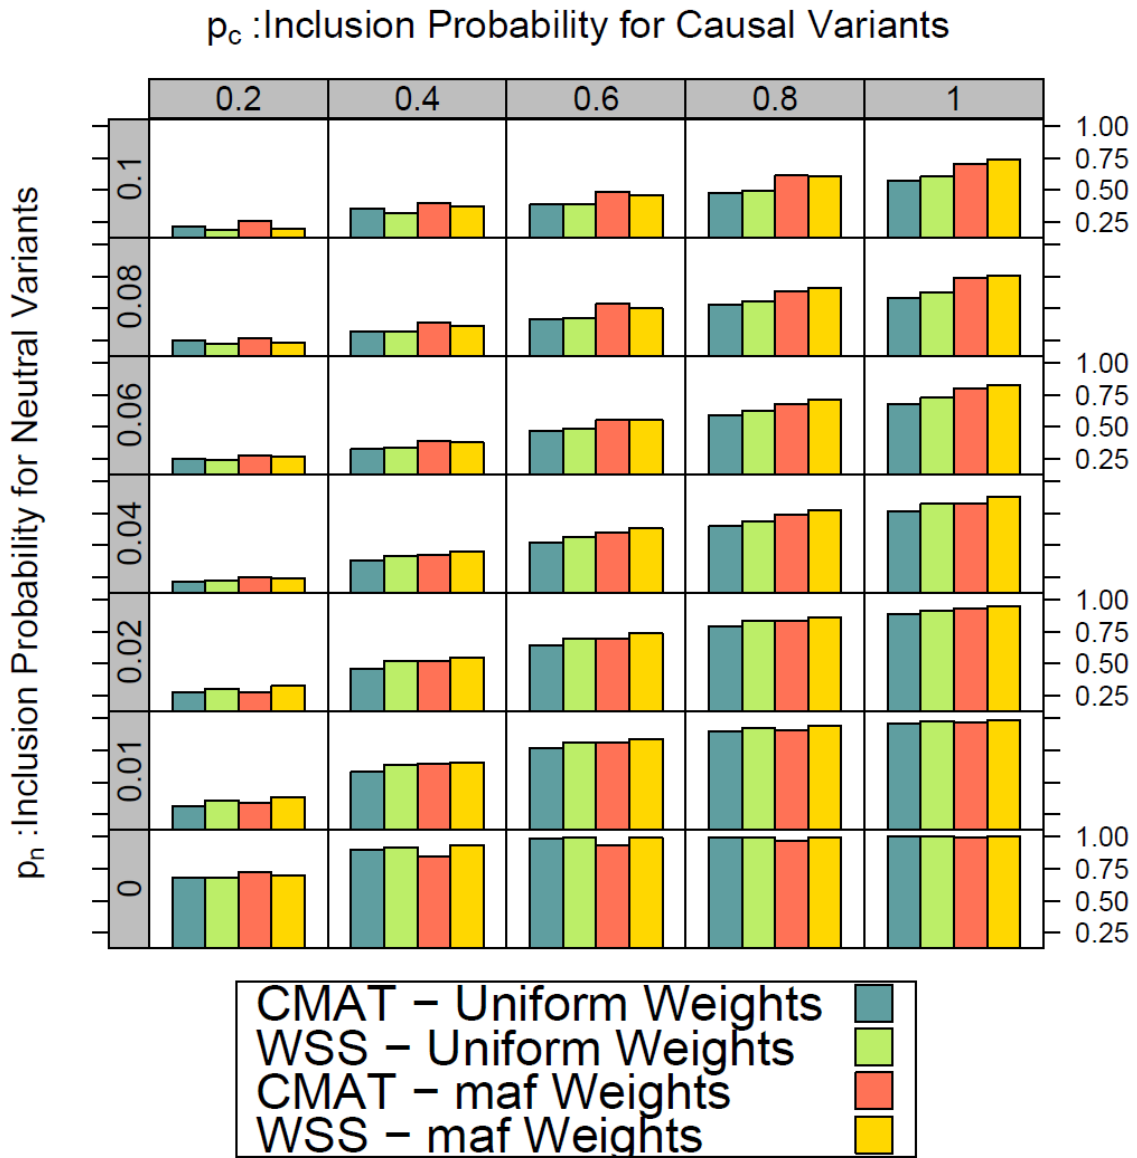

**Figure S3.** Power to analyze Deep Sequence Datasets for minor allele cutoff of  $\beta=1\%$ . Each dataset contains exact genotypes for  $N=1000$  cases and controls based on  $k=15$  causative variants in the population. Along the vertical axis we vary the probability of (incorrectly) including a neutral variant ( $p_n$ ) in the analysis and along the horizontal axis we vary the probability of (correctly) including a causative variant ( $p_c$ ). The height of the bars in each cell indicates the power for the four tests at  $\alpha=0.01$ . Here, the maximum allele frequency for risk variants ( $p_{\max}$ ) was set to 1%.

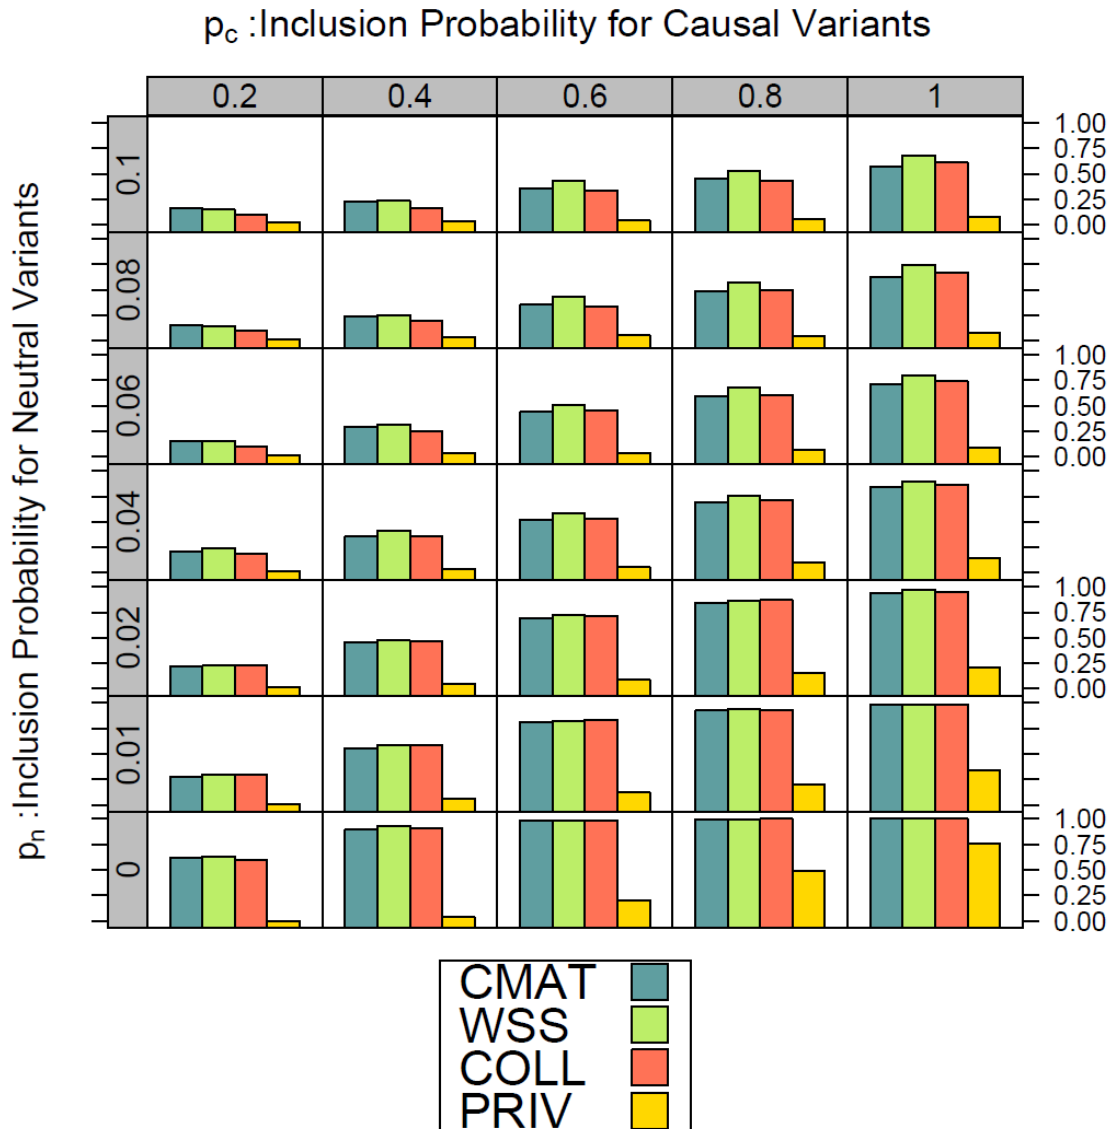

**Figure S4.** CMAT power for Imputation Datasets with minor allele cutoff of  $\beta=1\%$ . Datasets contain exact genotypes for  $N_{\text{seq}}$  cases and controls and probabilistic genotypes based on imputation for the remaining samples. The top line shows CMAT power for Deep Sequencing datasets ( $N_{\text{seq}} = N$ ) and serves as an upper bound for power at a fixed total sample size  $N$ . Here, the maximum allele frequency for risk variants ( $p_{\text{max}}$ ) was set to 1%. We report power at  $\alpha=0.01$  using the whole-gene inclusion threshold ( $p_n = 0.1$ ;  $p_c = 0.8$ ).

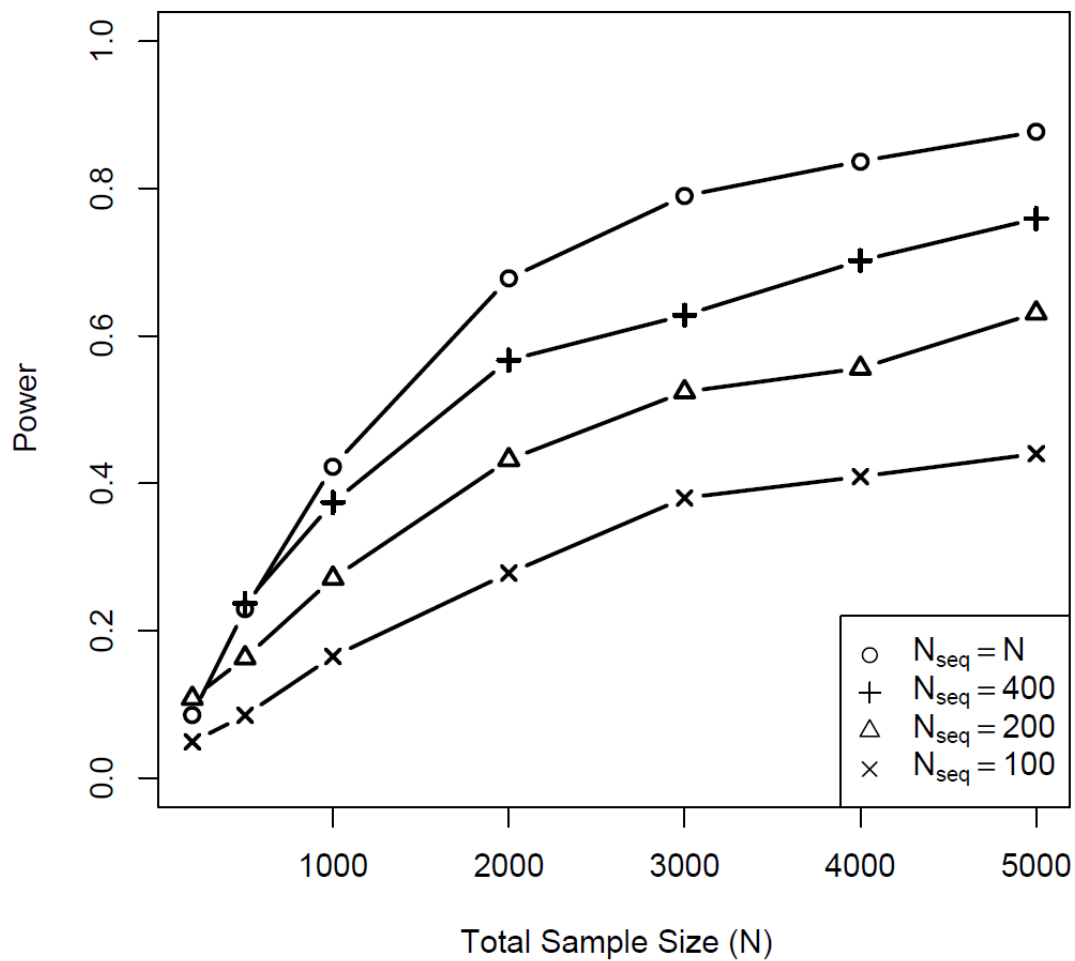

Supplement: mmc1.pdf [file mmc1.pdf]
